# Supplementary material for: Determinants of Colour Constancy and the Blue Bias
Source: PubMed Central journal article supplement (PMC5768282; doi:10.1177/2041669517739635), 2017-12-06
Supplement: supplementary_material.pdf [file supplementary_material.pdf]

# Supplementary Material

## Colour Naming Experiment

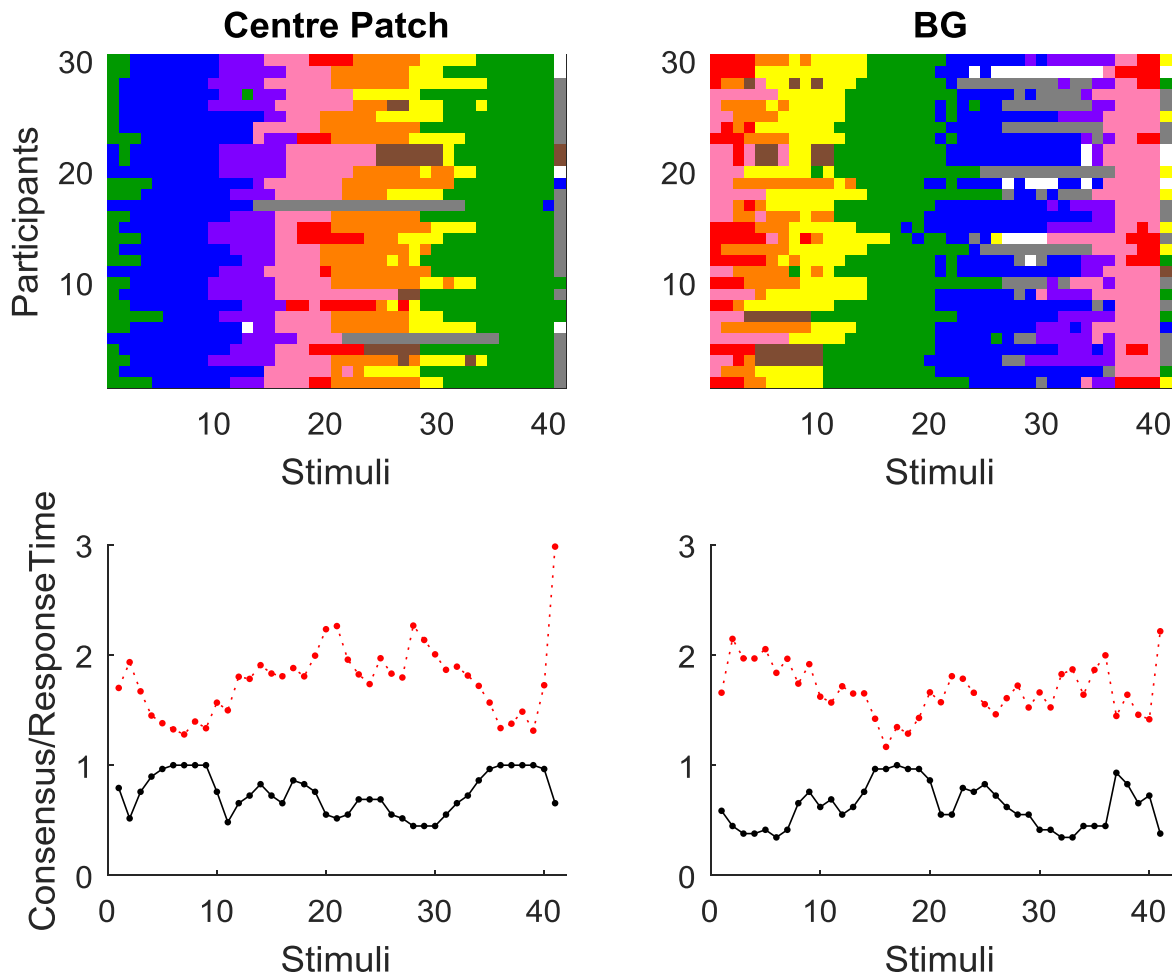

Figure S 1. Individual colour naming data. The black line in the lower graph indicates consistency, the dotted red line indicates response time.

| DKL azimuth<br>in degree | x     | y     | Y     | Opponent<br>Munsell Hue |
|--------------------------|-------|-------|-------|-------------------------|
| 213.8                    | 0.287 | 0.338 | 46.61 | 2.5R                    |
| 211.5                    | 0.281 | 0.339 | 50.22 | 5R                      |
| 218                      | 0.281 | 0.333 | 49.21 | 7.5R                    |
| 228.2                    | 0.284 | 0.326 | 47.75 | 10R                     |
| 234                      | 0.284 | 0.321 | 48.49 | 2.5YR                   |
| 240                      | 0.286 | 0.315 | 48.32 | 5YR                     |
| 243.6                    | 0.286 | 0.310 | 50.18 | 7.5YR                   |
| 250.2                    | 0.289 | 0.306 | 49.29 | 10YR                    |
| 254.4                    | 0.293 | 0.303 | 48.50 | 2.5Y                    |
| 257.2                    | 0.295 | 0.302 | 47.77 | 5YR                     |
| 260.3                    | 0.295 | 0.297 | 50.66 | 7.5Y                    |
| 263.7                    | 0.299 | 0.298 | 48.67 | 10Y                     |
| 266.3                    | 0.301 | 0.295 | 48.69 | 2.5GY                   |
| 269.2                    | 0.303 | 0.291 | 49.75 | 5GY                     |
| 281.3                    | 0.315 | 0.293 | 48.67 | 7.5GY                   |

|         |       |       |       |       |
|---------|-------|-------|-------|-------|
| 292.2   | 0.325 | 0.294 | 49.77 | 10GY  |
| 315.2   | 0.344 | 0.298 | 52.83 | 2.5G  |
| 336.9   | 0.358 | 0.306 | 52.94 | 5G    |
| 351.4   | 0.367 | 0.312 | 52.89 | 7.5G  |
| 358.5   | 0.372 | 0.317 | 53.13 | 10G   |
| 8.400   | 0.376 | 0.325 | 53.28 | 2.5BG |
| 18.60   | 0.380 | 0.333 | 53.59 | 5BG   |
| 24.70   | 0.385 | 0.339 | 53.40 | 7.5BG |
| 29.70   | 0.382 | 0.345 | 52.46 | 10BG  |
| 36.50   | 0.378 | 0.350 | 51.62 | 2.5B  |
| 43.20   | 0.375 | 0.355 | 51.37 | 5B    |
| 45.60   | 0.373 | 0.358 | 51.83 | 7.5B  |
| 53      | 0.368 | 0.363 | 50.38 | 10B   |
| 59.90   | 0.365 | 0.367 | 51.77 | 2.5PB |
| 65.10   | 0.360 | 0.370 | 49.98 | 5PB   |
| 76.80   | 0.355 | 0.377 | 52.44 | 7.5PB |
| 83.70   | 0.349 | 0.380 | 49.85 | 10PB  |
| 91.30   | 0.343 | 0.383 | 48.77 | 2.5P  |
| 102.6   | 0.335 | 0.388 | 49.56 | 5P    |
| 119.1   | 0.322 | 0.395 | 51.11 | 7.5P  |
| 130.3   | 0.310 | 0.395 | 51.28 | 10P   |
| 145.2   | 0.299 | 0.388 | 51.01 | 2.5RP |
| 163.9   | 0.290 | 0.375 | 51.81 | 5RP   |
| 179.8   | 0.286 | 0.363 | 50.83 | 7.5RP |
| 193.3   | 0.283 | 0.352 | 51.95 | 10RP  |
| NEUTRAL | 0.327 | 0.342 | 48.70 | N6.5  |

Table S1. Illuminant specifications. Judd-corrected chromaticity and luminance of all 41 illuminations.

## Achromatic Adjustments

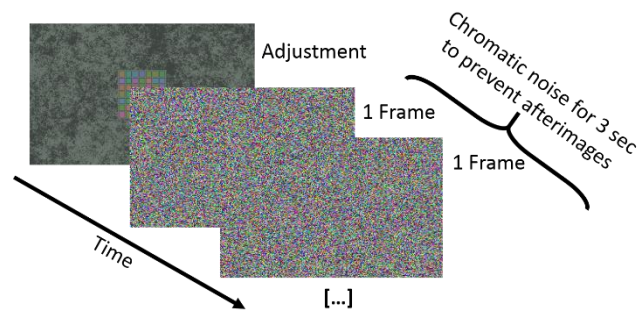

Figure S 2. A trial in the achromatic adjustment task. Note the chromatic noise patterns were presented after the adjustments to prevent after-images.

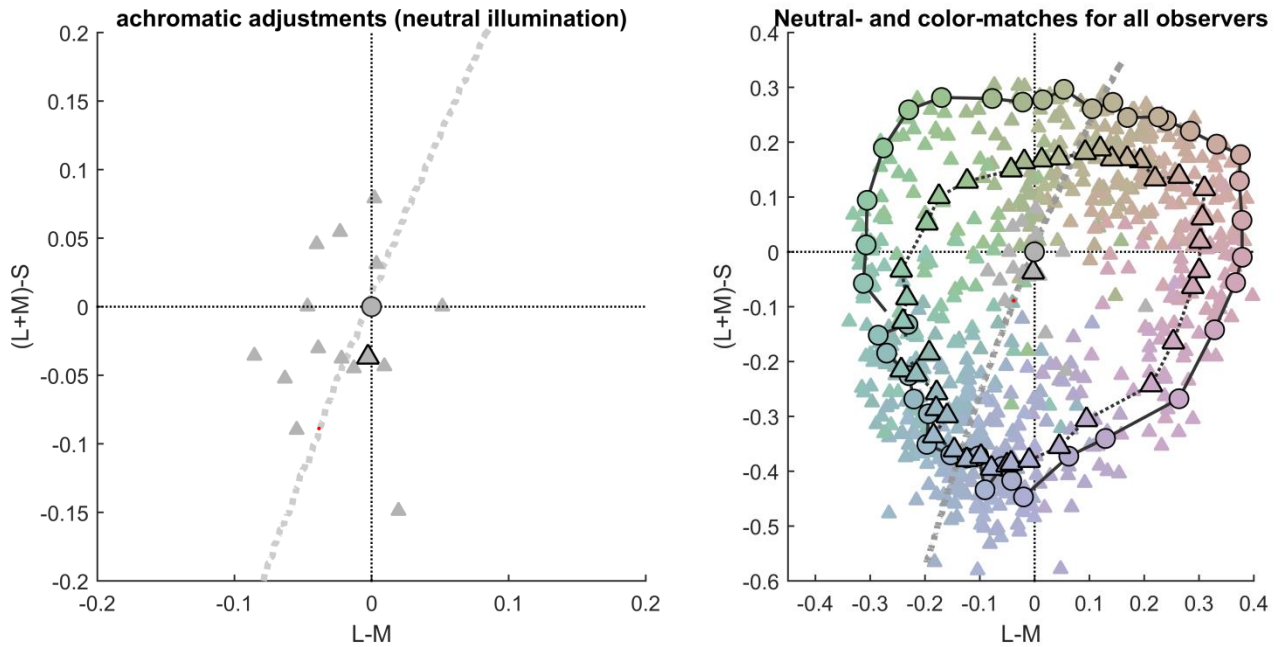

Figure S 3. A) Individual adjustments under the neutral illumination. Triangles depict neutral matches for 16 observers, the neutral illuminant is indicated by the circle with the back contour. The dotted line depicts the daylight locus from 5000K(top) to 8500K(bottom). Panel B shows individual adjustments(triangles) for all 41 illuminations tested in the experiment. Black-framed triangles depict average adjustments, black-framed discs indicate the coordinates of the illumination as measured from the brighter background surface.

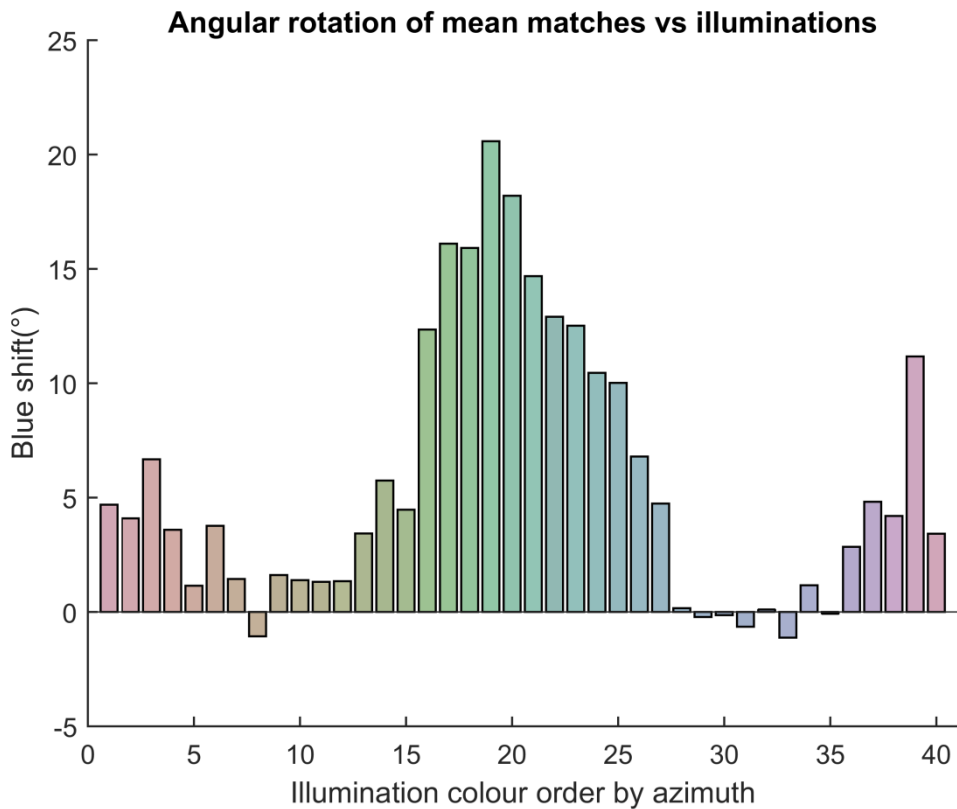

Figure S 4. Blue bias in angular rotations of mean matches relative to the according illuminations from yellow (78°) to daylight blue (238°). Positive values indicate that the average adjustment angle is shifted towards the angle of the bluish daylight illumination. The graphic demonstrates that the further illumination hues are away from the daylight blue–yellow axis, the more they are rotated towards blue.

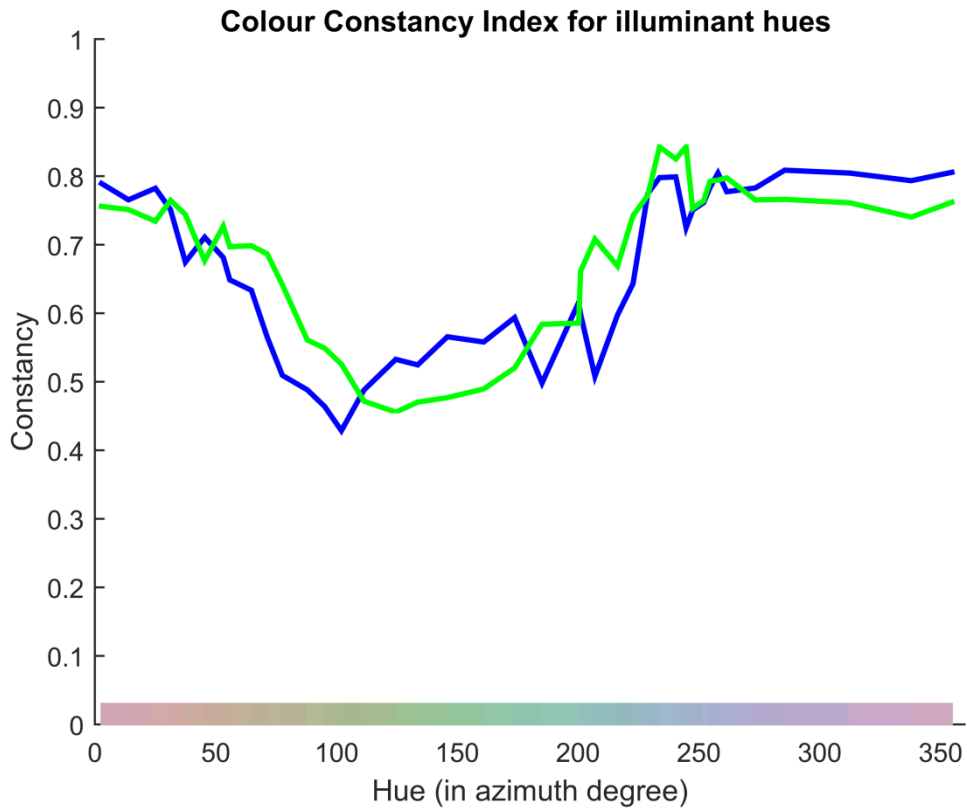

Figure S 5. Colour Constancy Index in DKL-space (green) and CIELAB (blue).

### Comparison with illumination discrimination and chromatic detection

|                 | df | Illumination discrimination |     | Chromatic Detection |     |
|-----------------|----|-----------------------------|-----|---------------------|-----|
|                 |    | r                           | p   | r                   | p   |
| CCI             | 10 | -.003                       | .99 | .08                 | .81 |
| BR              | 10 | .53                         | .08 | .35                 | .26 |
| Adj. error      | 10 | .12                         | .71 | -.04                | .91 |
| Interindi. Var. | 10 | .25                         | .43 | .36                 | .25 |

Table S2. Correlations between illumination discrimination, chromatic detection, and colour constancy in DKL-space.

## Candidate determinants

|                 | df | Illumination shift |             | Blue bias   |                  | BG categories |                  |             |                  | Patch categories |     |            |            | Colour variegation |             |             |            |
|-----------------|----|--------------------|-------------|-------------|------------------|---------------|------------------|-------------|------------------|------------------|-----|------------|------------|--------------------|-------------|-------------|------------|
|                 |    |                    |             |             |                  | Consensus     |                  | RT          |                  | Consensus        |     | RT         |            | M                  |             | SD          |            |
|                 |    | r                  | p           | r           | p                | r             | p                | r           | p                | r                | p   | r          | p          | r                  | p           | r           | P          |
| CCI             | 38 | .06                | .71         | <b>-.52</b> | <b>&lt; .001</b> | <b>-.61</b>   | <b>&lt; .001</b> | <b>.42</b>  | <b>.007</b>      | .23              | .15 | -.3        | .06        | <b>.37</b>         | <b>.02</b>  | .21         | .19        |
| Adj. error      | 38 | <b>.47</b>         | <b>.002</b> | <b>.67</b>  | <b>&lt; .001</b> | <b>.73</b>    | <b>&lt; .001</b> | <b>-.54</b> | <b>&lt; .001</b> | -.04             | .78 | .29        | .07        | <b>-.41</b>        | <b>.008</b> | <b>-.40</b> | <b>.01</b> |
| Interindi. Var. | 38 | <b>.43</b>         | <b>.005</b> | <b>.57</b>  | <b>&lt; .001</b> | <b>.70</b>    | <b>&lt; .001</b> | <b>-.53</b> | <b>&lt; .001</b> | -.13             | .42 | <b>.38</b> | <b>.02</b> | <b>-.50</b>        | <b>.001</b> | -.29        | .07        |

|                 | Metamer mismatch area |                  |               |                  | Sensory singularities |             |               |     | Cone ratio predictions |                  |               |            |
|-----------------|-----------------------|------------------|---------------|------------------|-----------------------|-------------|---------------|-----|------------------------|------------------|---------------|------------|
|                 | Correlations          |                  | Partial corr. |                  | Correlations          |             | Partial corr. |     | Correlation            |                  | Partial corr. |            |
|                 | r                     | p                | r             | p                | r                     | p           | r             | p   | r                      | p                | r             | p          |
| CCI             | -.13                  | .43              | <b>-.47</b>   | <b>.002</b>      | -.15                  | .35         | -.09          | .57 | -.11                   | .5               | -.26          | .1         |
| Adj. error      | <b>.61</b>            | <b>&lt; .001</b> | <b>.51</b>    | <b>&lt; .001</b> | <b>.35</b>            | <b>.03</b>  | .12           | .47 | <b>.53</b>             | <b>&lt; .001</b> | .29           | .07        |
| Interindi. Var. | <b>.58</b>            | <b>&lt; .001</b> | <b>.52</b>    | <b>&lt; .001</b> | <b>.42</b>            | <b>.008</b> | .22           | .17 | <b>.53</b>             | <b>&lt; .001</b> | <b>.35</b>    | <b>.03</b> |

Table S3. Correlations between colour constancy and candidate determinants in CIELAB. Bold faced numbers indicate significant correlations. Partial corr. = Partial correlations controlling for illumination shift (chroma of surfaces under neutral illumination in case of singularities).

## Illumination shift

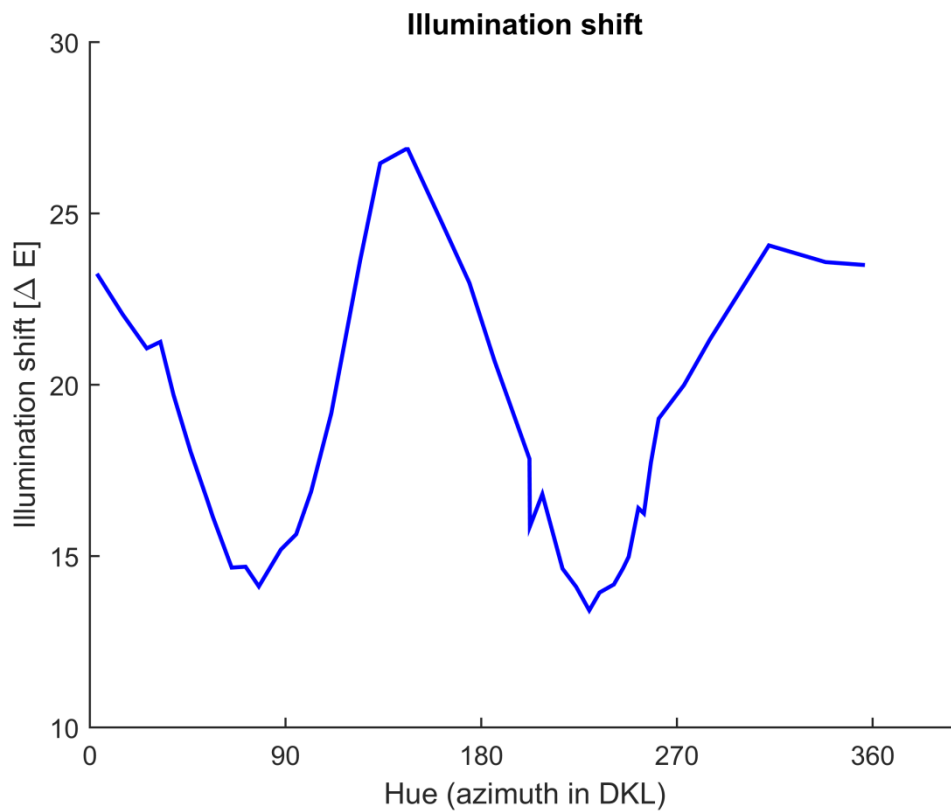

Figure S 6. Illumination shift in CIELAB.

**Colour categories**

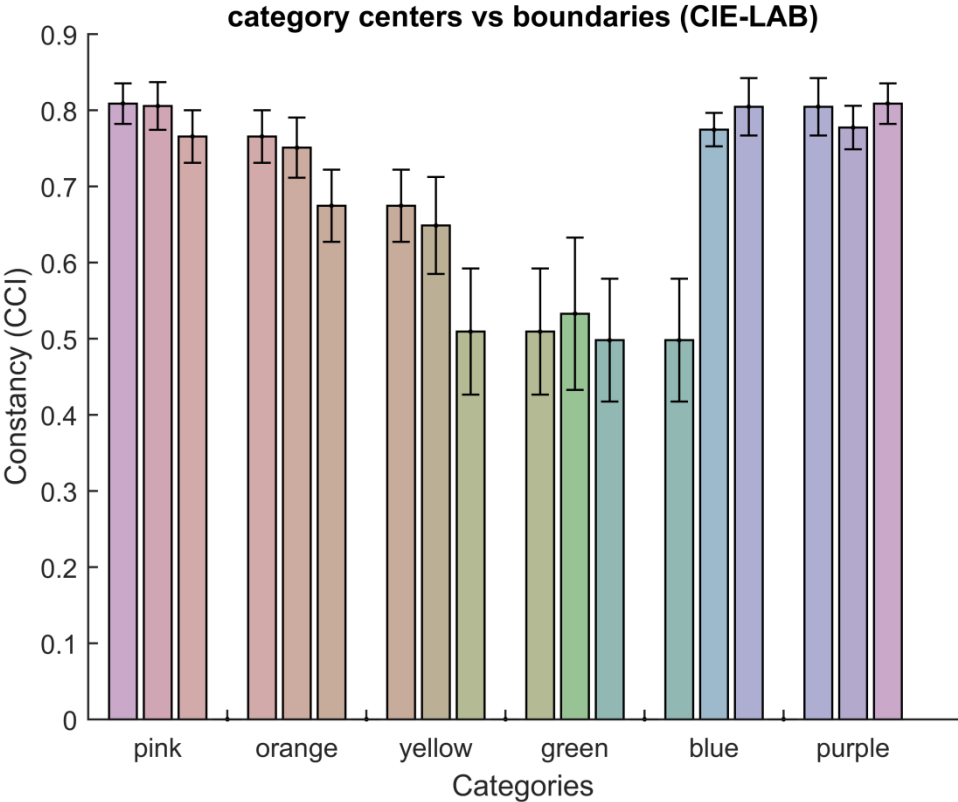

Figure S 7. Categorical colour constancy. The graphic compares the Colour Constancy Index between colour at the category centers and boundaries. Each group of three bars corresponds to one of the six categories. The bars in the center of each group correspond to the category centers, the other two to the category boundaries. The y-axis represents the Colour Constancy Index. In case of categorical colour constancy, the center colours (center bars) should yield higher constancy (higher bars) than the boundary colours. This is not the case for any of the categories.

---
